# Supplementary material for: Spatiotemporally restricted arenavirus replication induces immune surveillance and type I interferon-dependent tumour regression
Source: Nat Commun. 2017 Mar 1;8:14447. doi: 10.1038/ncomms14447 (PMC5337983; doi:10.1038/ncomms14447)
Supplement: Supplementary Information — Supplementary Figures and Supplementary Tables [file ncomms14447-s1.pdf]

## Supplementary Figure 1

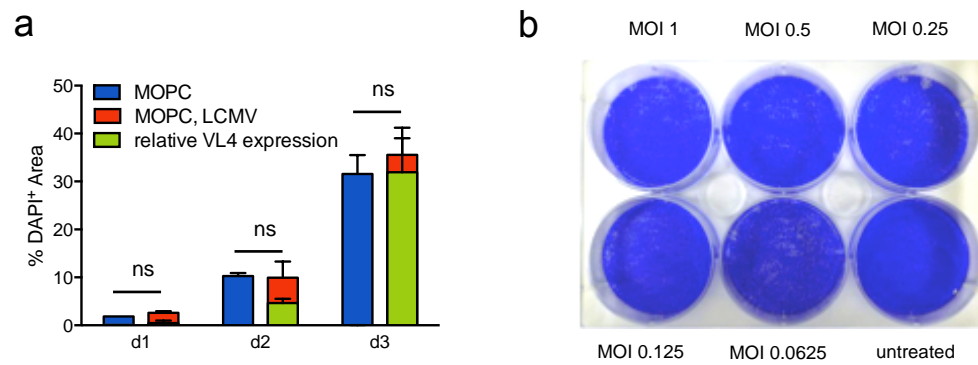

### Supplementary Figure 1: LCMV replicates in MOPC without affecting cell proliferation

**a:** Quantification of Immunofluorescence of MOPC cells untreated or infected with LCMV (MOI 1) 72 hours after infection (n = 3/group) (related to Fig. 1c). ns, non-significant. **b:** Non-impaired clonogenic survival of MOPC cells after in vitro LCMV WE infection. Representative photograph of long-term colony formation following incubation of MOPC with LCMV WE of indicated MOI.

## Supplementary Figure 2

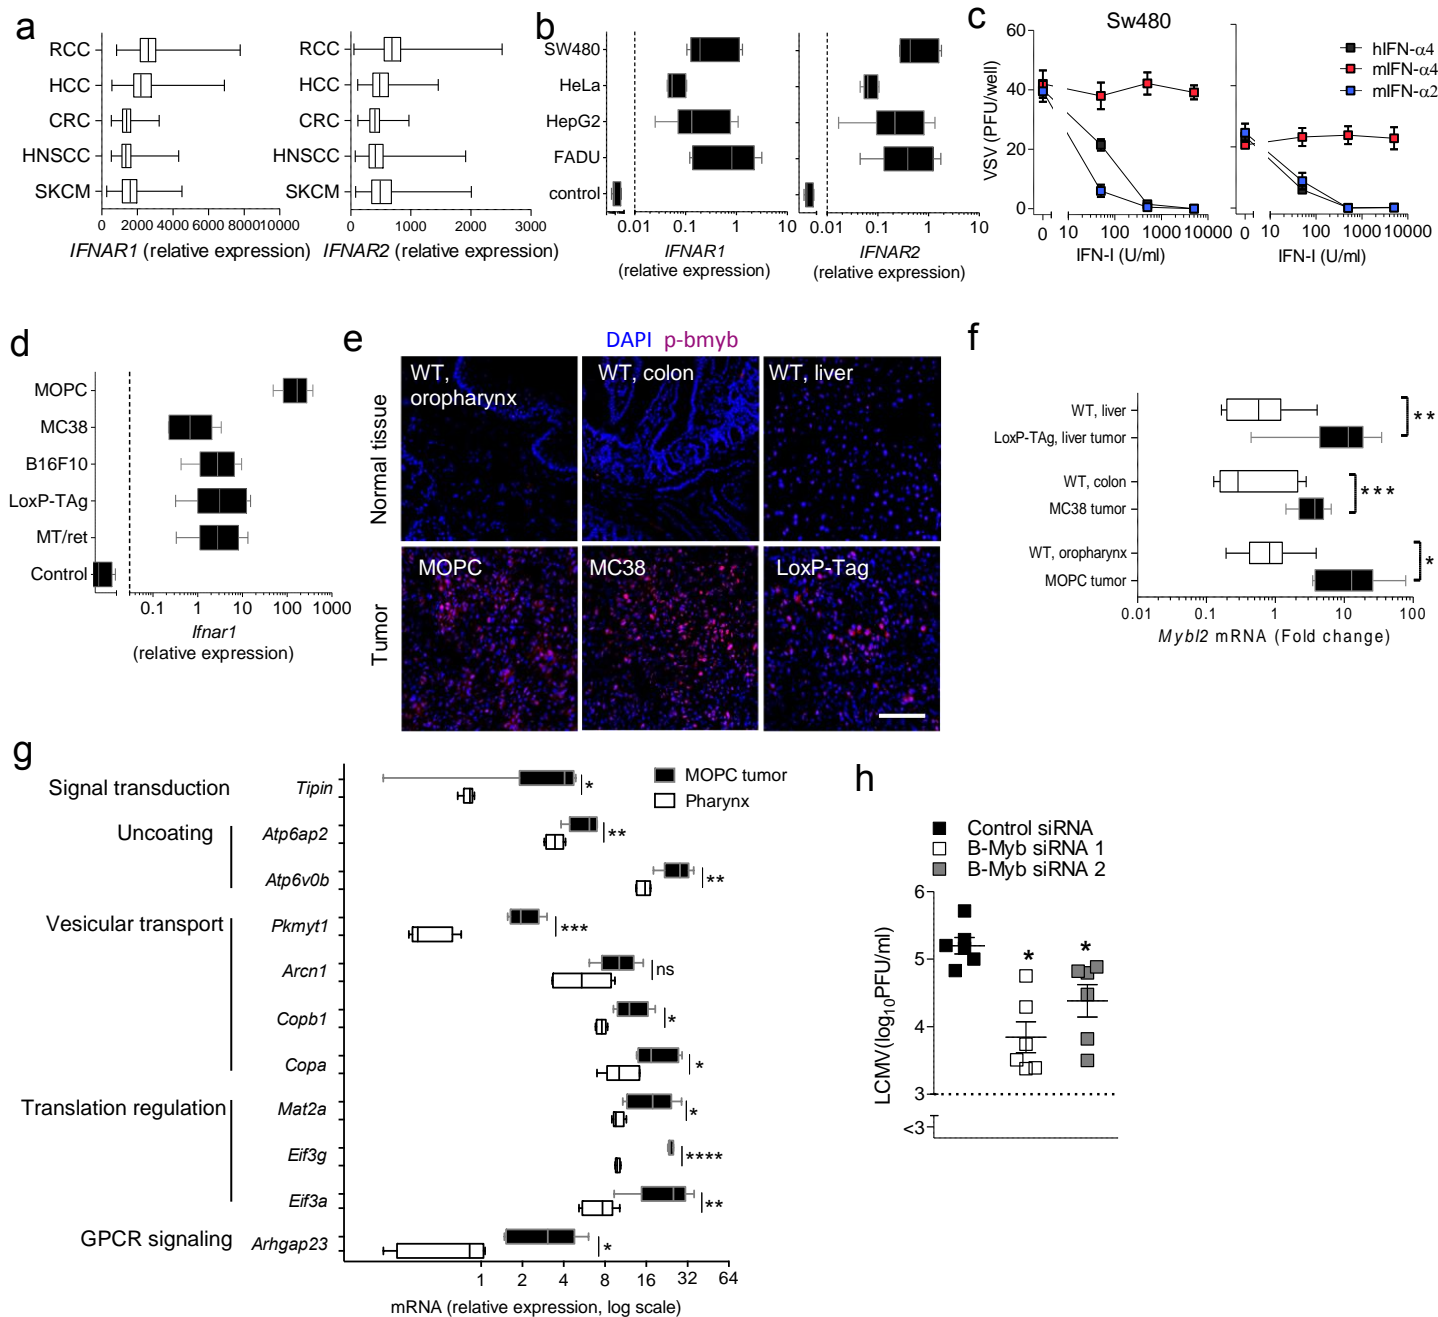

### Supplementary Figure 2: B-Myb expression, and not IFN-I unresponsiveness, is one factor promoting arenavirus replication

**a:** mRNA expression levels of *Ifnar1* and *Ifnar2* for the cancer types renal cell cancer (RCC; n=534), hepatocellular cancer (HCC; n=373), colorectal cancer (CRC; n=382), head and neck squamous cell cancer (HNSCC; n=522) and skin cutaneous melanomas (SKCM; n=471). Downloaded from the TCGA database by use of cBioPortal ([www.cbioportal.org](http://www.cbioportal.org)). Data are shown as mean and minimum-maximum whiskers. **b:** qRT-PCR of human *Ifnar1* and *Ifnar2* mRNA expression in Sw480, HeLa, HepG2, FADU cells and controls (murine mRNA, n=5/group). **c:** Number of viral plaques in Sw480 cell layer (n=6/group, left panel) and HeLa cell layer (n=5/group, right panel), which were treated with different concentrations of human IFN $\alpha$ 4, murine IFN $\alpha$ 4 or murine IFN $\alpha$ 2 and infected with VSV (MOI 0.01) 24 hours earlier. **d:** qRT-PCR of murine *Ifnar1* mRNA in MOPC cells, MC38 cells, B16F10 cells, LoxP-Tag tumors, MT/ret cells and control (human mRNA, n=5/group). **e&f:** Immunofluorescence of phospho-B-Myb (e, n=3/group) and qRT-PCR of B-Myb (=Myb2) mRNA (f, n = 9-10/group) in MOPC, MC38 and LoxP-Tag tumors compared to the correlating healthy tissue (oropharyngeal epithelia, colon and liver). Scale bar, 200 $\mu$ m. **g:** qRT-PCR of viral host factors in MOPC tumors (n=5) and pharynx tissue (n=5). **h:** Infectious LCMV particles in supernatant of MCF7 cells, which were treated with control siRNA or two separate B-Myb siRNAs and then 24 hours later infected with LCMV (MOI 1) analyzed 24 hours after infection (n = 6/group). Data are shown as mean  $\pm$  SEM and analyzed by unpaired Student's t-test. ns, non significant; \*p < 0.05; \*\*p < 0.01; \*\*\*p < 0.001.

## Supplementary Figure 3

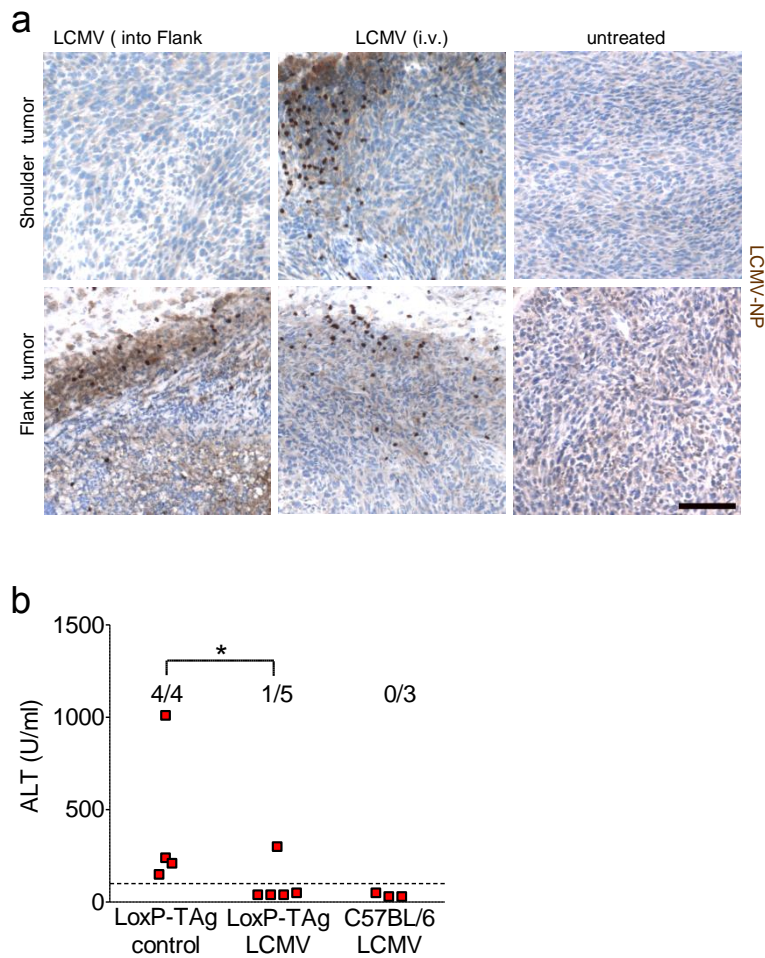

### Supplementary Figure 3: Intravenous infection leads to viral replication in metastasis

**a:** Immunohistochemistry for LCMV-NP in flank and shoulder tumor (day 15) from C57BL/6 mice receiving simultaneously subcutaneously  $5 \times 10^5$  MOPC cells in the flank and shoulder (day -3), treated with or without  $2 \times 10^4$  PFU LCMV given into the flank or intravenously on day 0 ( $n=4-5$ /group). Scale bar, 200 $\mu$ m. **b:** Serum alanine-aminotransferase (ALT) levels of C57BL/6 ( $n=3$ ) and adenovirally induced tumor bearing LoxP-TAg mice (11 month old) which were left untreated ( $n=4$ ) or which were additionally treated with  $2 \times 10^6$  PFU of LCMV-WE ( $n=5$ ) measured 20 days after infection. Values above line indicate pathological liver disease.

## Supplementary Figure 4

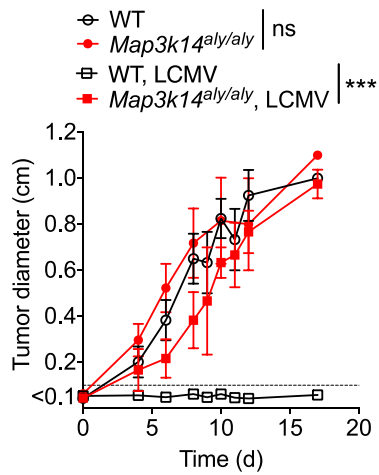

### Supplementary Figure 4: Immune cell infiltrates are required for tumor regression

Tumor diameter of MOPC-tumor bearing WT and *Map3k14*<sup>aly/aly</sup> mice (day -3) treated with (n=8 WT; n=6 *Map3k14*<sup>aly/aly</sup>) or without (n=7 WT; n=6 *Map3k14*<sup>aly/aly</sup>)  $2 \times 10^4$  PFU LCMV peritumorally on day 0. Data are shown as mean  $\pm$  SEM and analyzed by unpaired Student's t-test. ns, non significant; \*\*\*p < 0.001.

## Supplementary Figure 5

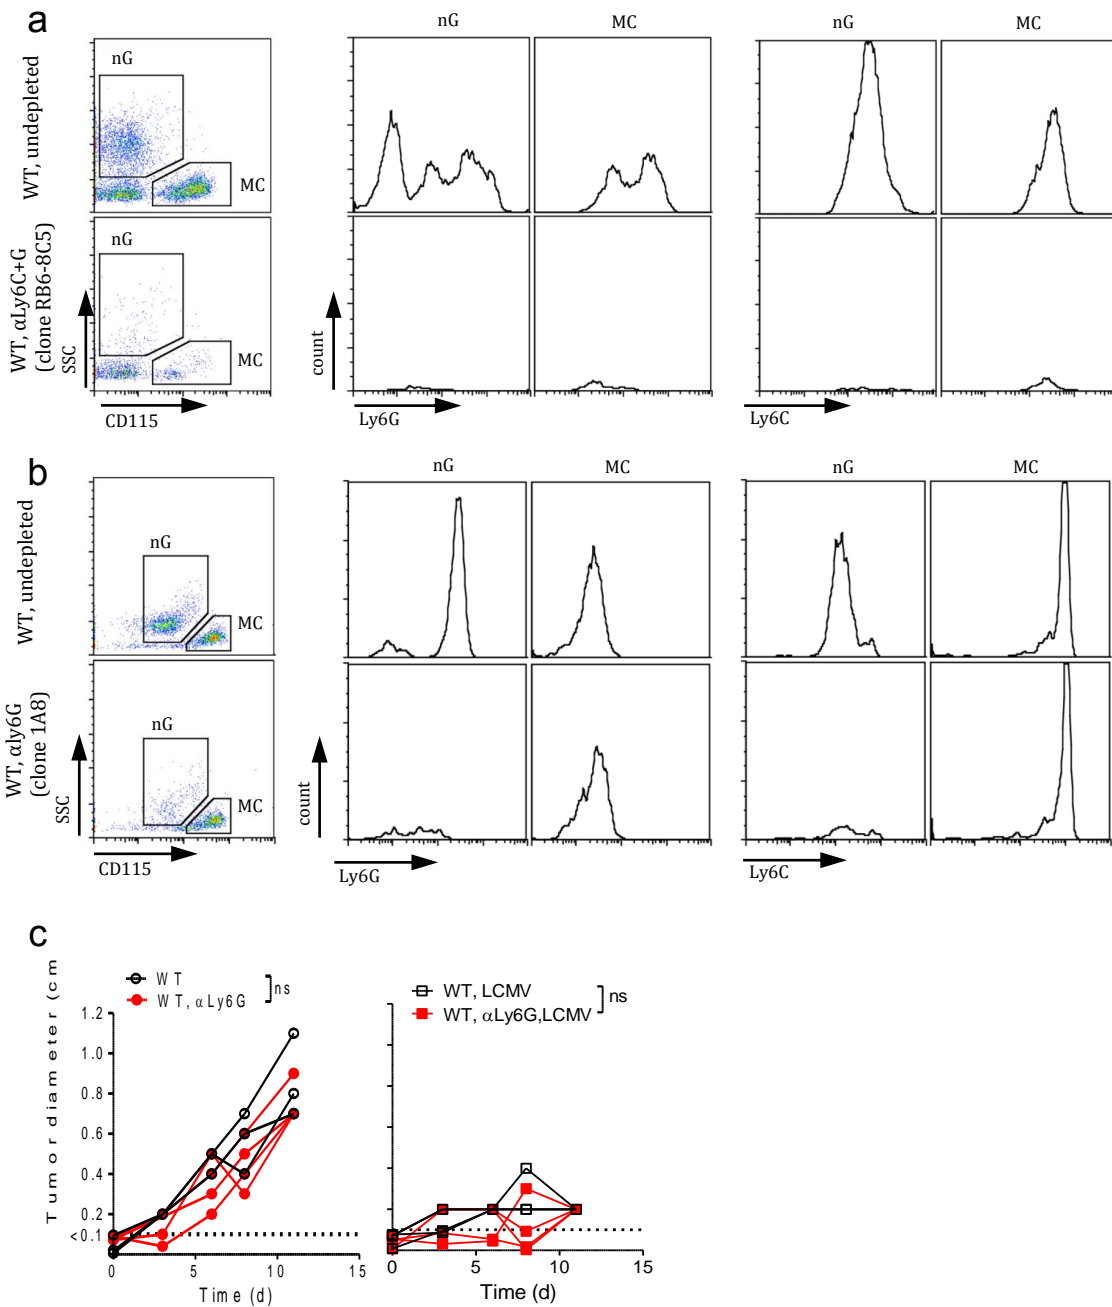

### Supplementary Figure 5: Tumor infiltrating Ly6C<sup>+</sup> cells are indispensable for antitumoral LCMV therapy

MOPC tumor bearing C57BL/6J mice were treated with  $2 \times 10^4$  PFU LCMV peritumorally on day 0. Depletion was performed by i.p. injection of either (a)  $\alpha$ Ly6C+G (clone RB6-8C5) 200 $\mu$ g or (b and c)  $\alpha$ Ly6G (clone 1A8) 500 $\mu$ g starting on d-2 and repeated on d2 and d7. **a&b**: Representative dot blots of peripheral vein blood collected on d4 and stained for monocyte and granulocyte cell markers after preselection of CD11b positive cells. **c**: Tumor diameter in C57BL/6 mice injected with or without  $\alpha$ Ly6G (1A8) antibody (n=3-4/group).

Data are shown as mean  $\pm$  SEM and analyzed by unpaired Student's t-test. ns, non-significant.

## Supplementary Figure 6

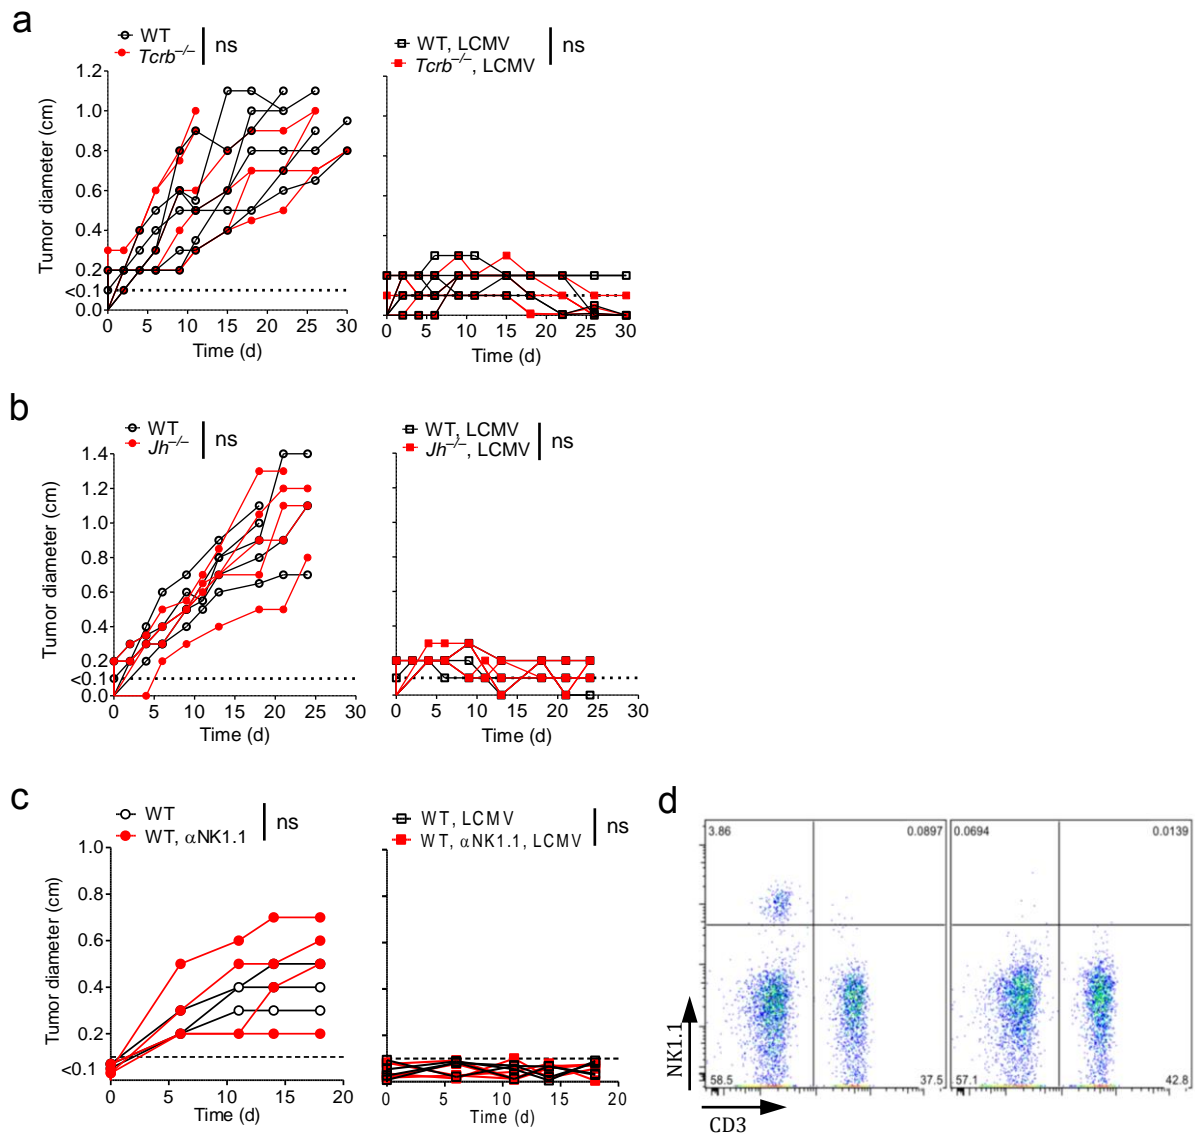

### Supplementary Figure 6: Impact of adaptive immune system and NK cells on LCMV-induced anti-tumoral immunity.

**a:** Tumor diameter of MOPC-tumor bearing WT and *Tcrab*<sup>-/-</sup> mice (day -3) treated with or without  $2 \times 10^4$  PFU LCMV peritumorally on day 0 (n=5/group). **b:** Tumor diameter of MOPC-tumor bearing WT and *Jh*<sup>-/-</sup> mice (day -3) treated with or without  $2 \times 10^4$  PFU LCMV peritumorally on day 0 (n=5/group). **c&d:** Tumor diameter (c) and representative dot blot from peripheral vein blood collected at day 2 and stained for NK cell markers (d) of WT mice which were NK depleted by i.p. injection of 400 $\mu$ l NK1.1 antibody on day -3 and day -1 (n = 4/group).

Data are shown as mean  $\pm$  SEM and analyzed by unpaired Student's t-test. ns, non-significant.

## Supplementary Figure 7

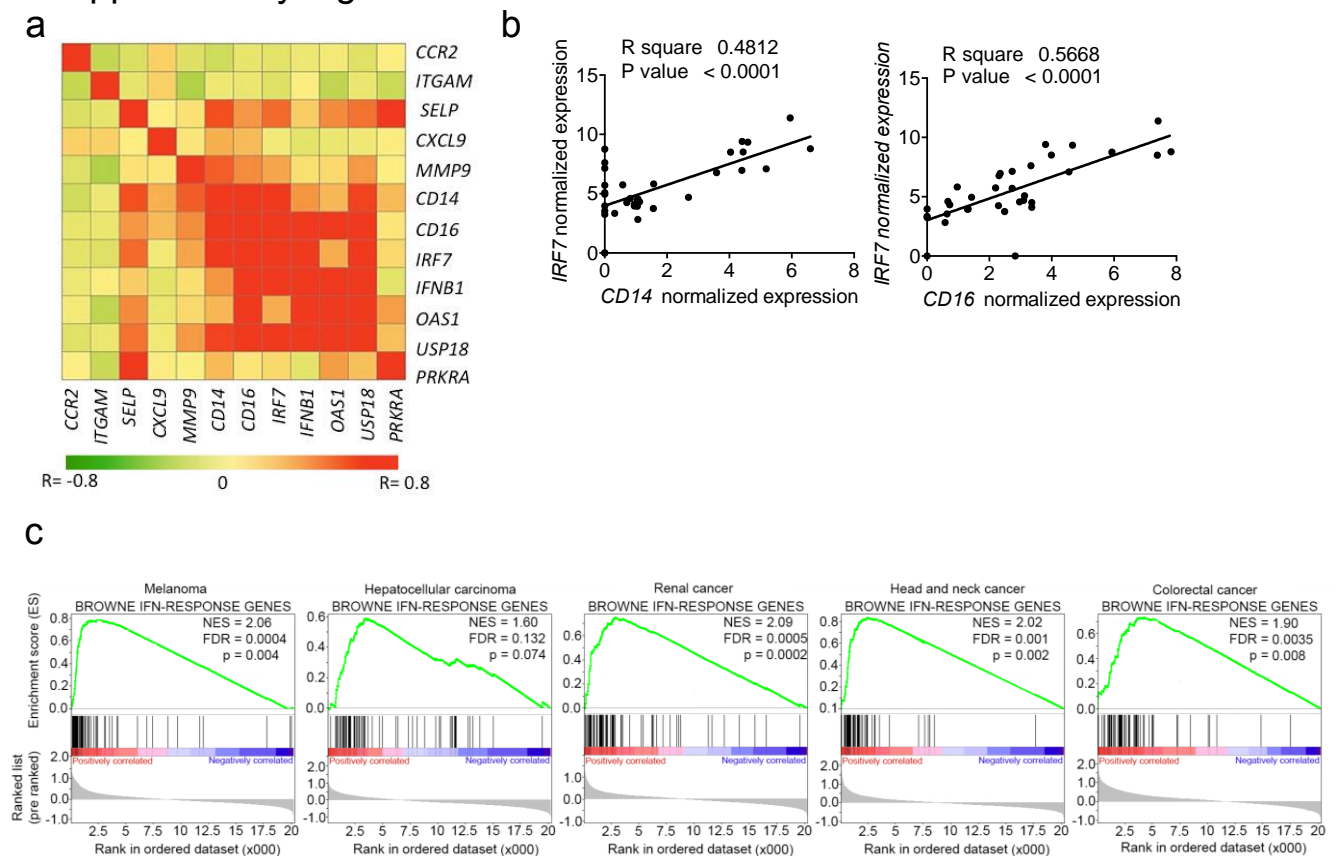

### Supplementary Figure 7: Monocyte recruitment in human cancers correlates with IFN-I induction

**a:** Heatmap of correlation analyses of 12 immunogenes mRNAs of primary samples from 34 oropharyngeal cancer patients. **b:** Linear regression between *IRF7* and the human monocyte markers *CD14* and *CD16*. **c:** Gene-set enrichment analysis (GSEA) of human IFN-I induced genes by usage of the Browne interferon-related gene-set. IFN-I-induced expression profile and genes ranked by extent of differential expression in TCGA melanoma, hepatocellular carcinoma, renal cancer, head and neck cancer and colorectal cancer dataset. NES, normalized enrichment score; FDR, false discovery rate.

## Supplementary Figure 8

a

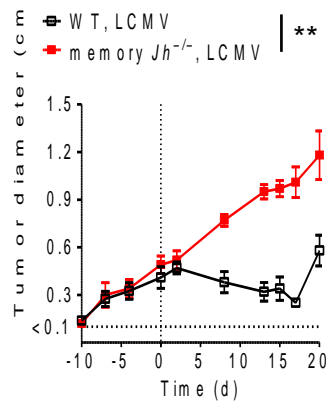

b

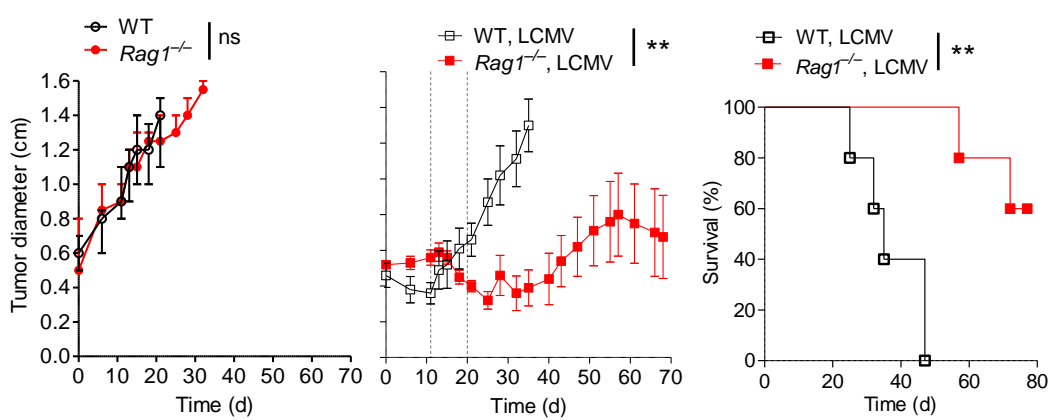

c

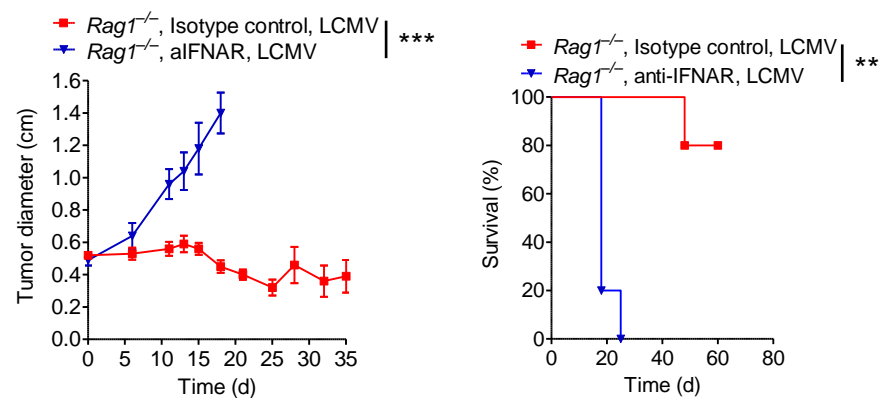

### Supplementary Figure 8: Virus-specific memory $CD8^+$ T cells prevent LCMV-induced tumor regression

**a:** Tumor diameter of MOPC-tumor bearing WT or memory  $Jh^{-/-}$  mice (pretreated with 200 PFU LCMV i.v. 100 days before tumor inoculation) treated with LCMV  $2 \times 10^4$  PFU intravenously on day 0 ( $n = 5/\text{group}$ ). **b:** Tumor diameter and survival from MOPC-tumor transplanted WT and  $Rag1^{-/-}$  mice (day -10) treated with or without  $2 \times 10^4$  PFU LCMV intratumorally on day 0 ( $n = 5/\text{group}$ ). **c:** Tumor diameter and survival from MOPC-tumor transplanted  $Rag1^{-/-}$  mice (day -10) treated with anti-IFNAR1 antibody or isotype control ( $n = 5/\text{group}$ ). Data are shown as mean  $\pm$  SEM and analyzed by unpaired Student's t-test. Survival is shown in Kaplan-Meier method and analyzed by log-rank test. ns, non-significant; \* $p < 0.05$ ; \*\* $p < 0.01$ ; \*\*\* $p < 0.001$ .

## Supplementary Figure 9

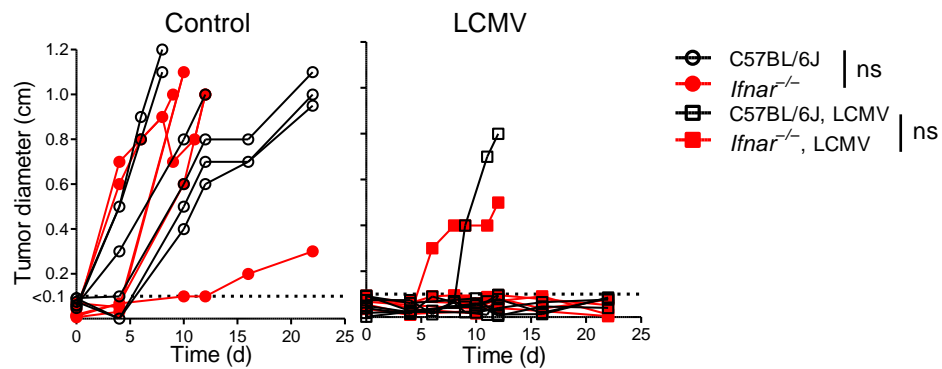

### Supplementary Figure 9: Anti-tumoral effect of LCMV is independent of host IFNAR expression.

Tumor diameter of *Ifnar*<sup>-/-</sup> and C57BL/6 control mice injected with  $5 \times 10^5$  MOPC cells (day -3) subcutaneously and either left untreated (left) or treated with  $2 \times 10^4$  PFU LCMV peritumorally (right, day 0) ( $n = 6-7$ /group). Measurements were performed on the indicated days. ns, non-significant.

## Supplementary Figure 10

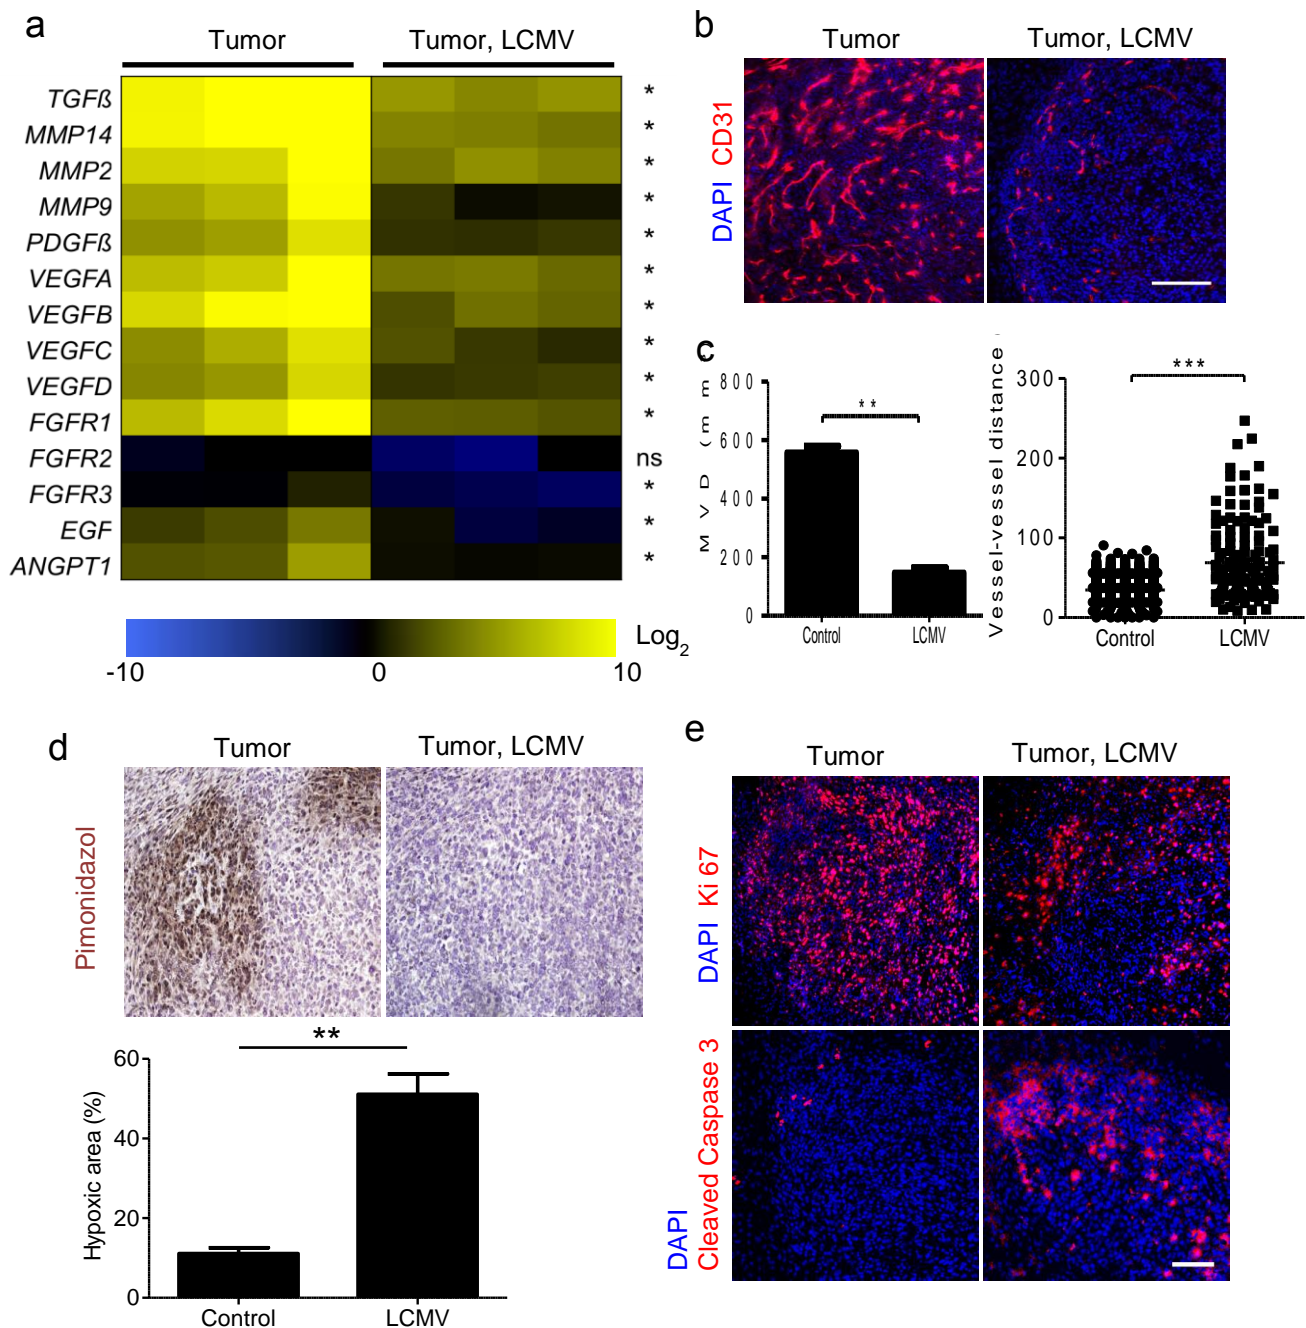

### Supplementary Figure 10: Reduced vascularisation correlates with arenavirus mediated tumor regression

**a:** qRT-PCR from tumors of MOPC-tumor bearing WT mice (day -3) treated with or without  $2 \times 10^4$  PFU LCMV peritumorally (day 0), analyzed on day 6 (n = 3/group). **b&c:** Immunofluorescence (b, n = 3/group, CD31, red; DAPI, blue) and quantification of microvessel density (MVD) and vessel-vessel distances (c, n = 3/group) from MOPC-tumor bearing C57BL/6 mice (day -3) which were treated with or without  $2 \times 10^4$  PFU LCMV peritumorally (day 0) measured on day 6. **d:** Immunohistochemistry (day 6) and quantification (day 9) of hypoxic areas from tumors of MOPC-tumor bearing C57BL/6 mice (day -3) treated with or without  $2 \times 10^4$  PFU LCMV peritumorally on day 0 (n = 3 mice/group). **e:** Immunofluorescence of tumors from MOPC-tumor bearing C57BL/6 (day -3) treated with or without  $2 \times 10^4$  PFU LCMV peritumorally on day 0 (n = 3/group, Ki-67 or cleaved caspase 3, red; DAPI, blue). Data are shown as mean  $\pm$  SEM and analyzed by unpaired Student's t-test. ns, non-significant; \*p < 0.05; \*\*p < 0.01; \*\*\*p < 0.001; Scale bar = 200μm.

Supplementary Table 1

| Antibody                           | Manufacturer      | Catalogue number |
|------------------------------------|-------------------|------------------|
| Anti-B MyB (phospho T487)          | Origene           | TA301225         |
| Anti-CD90.2                        | eBiosciences      | 11-0903          |
| Anti-CD4                           | BD Pharmingen     | 17-0042          |
| Anti-CD8                           | eBiosciences      | 553035           |
| Anti-CD45R (B220)                  | BD Pharmingen     | 17-0452          |
| Anti-Ly6C                          | eBiosciences      | 17-5932          |
| Anti-Ly6G                          | eBiosciences      | 11-5931          |
| Anti-CD115                         | eBiosciences      | 12-1152          |
| Anti-CD11b                         | eBiosciences      | 47-0112          |
| Anti-CD11c                         | eBiosciences      | 11-0114          |
| Anti-mPDCA                         | Miltenyi          | 130-091-964      |
| Anti-CD31                          | eBiosciences      | 11-0311-81       |
| Anti-Ki-67                         | Thermo Scientific | RM-9106-S        |
| Anti-Cleaved Caspase-3<br>(Asp175) | Cell signalling   | #9579            |
| Anti-CD274 (PD-L1, B7-H1)          | eBioscience       | 12-5982          |
| Anti-CD279 (PD-1)                  | eBioscience       | 11-9981          |
| Anti-CD127 (IL-7Ra)                | eBioscience       | 17-1271          |
| Anti- CD25 (IL-2Ra)                | eBioscience       | 12-0251          |
| Anti-NK1.1                         | eBioscience       | 12-5941          |
| Anti-CD3                           | eBioscience       | 11-0031          |

**Supplementary Table 1: List of antibodies used for immunofluorescence.** All antibodies listed were used in 1:100 dilutions to their original concentration for flow-cytometry and/or for immunohistochemistry.

## Supplementary Table 2

| Primer             | number        |
|--------------------|---------------|
| Eukaryotic 18S RNA | #4333760T     |
| GAPDH              | Mm03302249_g1 |
| Tipin              | Mm00600456_m1 |
| Atp6ap2            | Mm00510396_m1 |
| Atp6v0b            | Mm01193846_g1 |
| Pkmyt1             | Mm01309244_m1 |
| Arcn               | Mm00524375_m1 |
| Copb1              | Mm00446330_m1 |
| Copa               | Mm00550231_m1 |
| Mat2a              | Mm00728688_s1 |
| Eif3g              | Mm00469383_m1 |
| Eif3a              | Mm00468721_m1 |
| Arhgap23           | Mm01722379_m1 |
| MYBL2              | Mm00485340_m1 |
| Ifnar1             | Mm00439544_m1 |
| Ifnar2             | Mm00494916_m1 |
| TGF $\beta$        | Mm01178820_m1 |
| MMP14              | Mm00485054_m1 |
| MMP2               | Mm00439498_m1 |
| MMP9               | Mm00442991_m1 |
| PDGF $\beta$       | Mm00440677_m1 |
| VEGFA              | Mm00437306_m1 |
| VEGFB              | Mm00442102_m1 |
| VEGFC              | Mm00437310_m1 |
| VEGFD (Figf)       | Mm01131929_m1 |
| FGFR1              | Mm00438930_m1 |
| FGFR2              | Mm01269930_m1 |
| FGFR3              | Mm00433294_m1 |
| EGF                | Mm00438696_m1 |
| ANGPT1             | Mm00456503_m1 |
| SELL               | Mm00441291_m1 |
| CCL5               | Mm01302427_m1 |
| CXCL3              | Mm01701838_m1 |
| Csf3               | Mm00438334_m1 |
| CXCL15             | Mm00441263_m1 |
| CXCL1              | Mm04207460_m1 |

### Supplementary Table 2: List of murine Primers for Taqman qPCR

List of commercially available TaqMan® Gene Expression Assays from Life technologies used for detection of murine gene expression via qPCR.

### Supplementary Table 3

| Primer         | number     |
|----------------|------------|
| Gapdh          | QT01658692 |
| IFN $\alpha$ 4 | QT01774353 |
| IFN $\beta$    | QT00249662 |
| IRF7           | QT00245266 |
| OAS1           | QT01056048 |
| ISG15          | QT02274335 |
| Ly6C           | QT00247604 |
| CCR2           | QT02276813 |
| CCL2           | QT00167832 |

**Supplementary Table 3: List of murine Primers for SYBR Green-based qPCR**

List of commercially available QuantiTect Primer Assays used for detection of murine gene expression via qPCR.

## Supplementary Table 4

| Primer             | number        |
|--------------------|---------------|
| Eukaryotic 18S RNA | #4333760T     |
| IFNAR1             | Hs01066116_m1 |
| IFNAR2             | Hs01022059_m1 |
| CCR2               | Hs00704702_s1 |
| ITGAM              | Hs00167304_m1 |
| SELP               | Hs00927900_m1 |
| CXCL9              | Hs00171065_m1 |
| MMP9               | Hs00957562_m1 |
| CD14               | Hs02621496_s1 |
| CD16               | Hs04334165_m1 |
| IRF7               | Hs01014809_g1 |
| IFNB1              | Hs01077958_s1 |
| OAS1               | Hs00973635_m1 |
| USP18              | Hs00276441_m1 |
| PRKRA              | Hs00269379_m1 |

### Supplementary Table 4: List of human Primers for Taqman qPCR

List of commercially available TaqMan® Gene Expression Assays from Life technologies used for detection of human gene expression via qPCR.

## Supplementary Table 5

| Primer             | Sequence                            |
|--------------------|-------------------------------------|
| LCMV WE NP Forward | 5'- CAA AGT ATT CAC ACG GCA TGG A   |
| LCMV WE NP Reverse | 5'- TGG GAG AGC ACC TAT AAC TGA TGA |

### Supplementary Table 5: LCMV-NP Primer Sequences
